# Supplementary material
Source: publisher figshare collection journal article supplement (https://tandf.figshare.com/ndownloader/files/14464256)
Supplement: Supplementary file 1 [file 14464256]

**Supplementary Figure 1:** Flowchart showing case exclusion steps (IHC: immunohistochemistry, TMA: tissue microarray)

Nordic cystectomy trials I&II randomized; n=642

Non Swedish patients; n=318

Eligible patients; n=324

Swedish patients without tissue samples; n=74

Eligible patients for IHC; n=250

Exclusion of T1G3 patients; n=3

Inadequate tumor cells on TMA samples; n=11

Eligible patients with adequate Bcl-2 IHC; n=236

Only cystectomy; n=117

Neoadjuvant chemotherapy and cystectomy; n=119
